# Supplementary material for: Harnessing the Power of Single Cell Large Language Models with Parameter Efficient Fine-Tuning using scPEFT
Source: Research Square preprint supplement (doi:10.21203/rs.3.rs-5926885/v1), 2025-04-25
Supplement: Supplementary file 1 [file 56543271590414e8a2c8aba2.pdf]

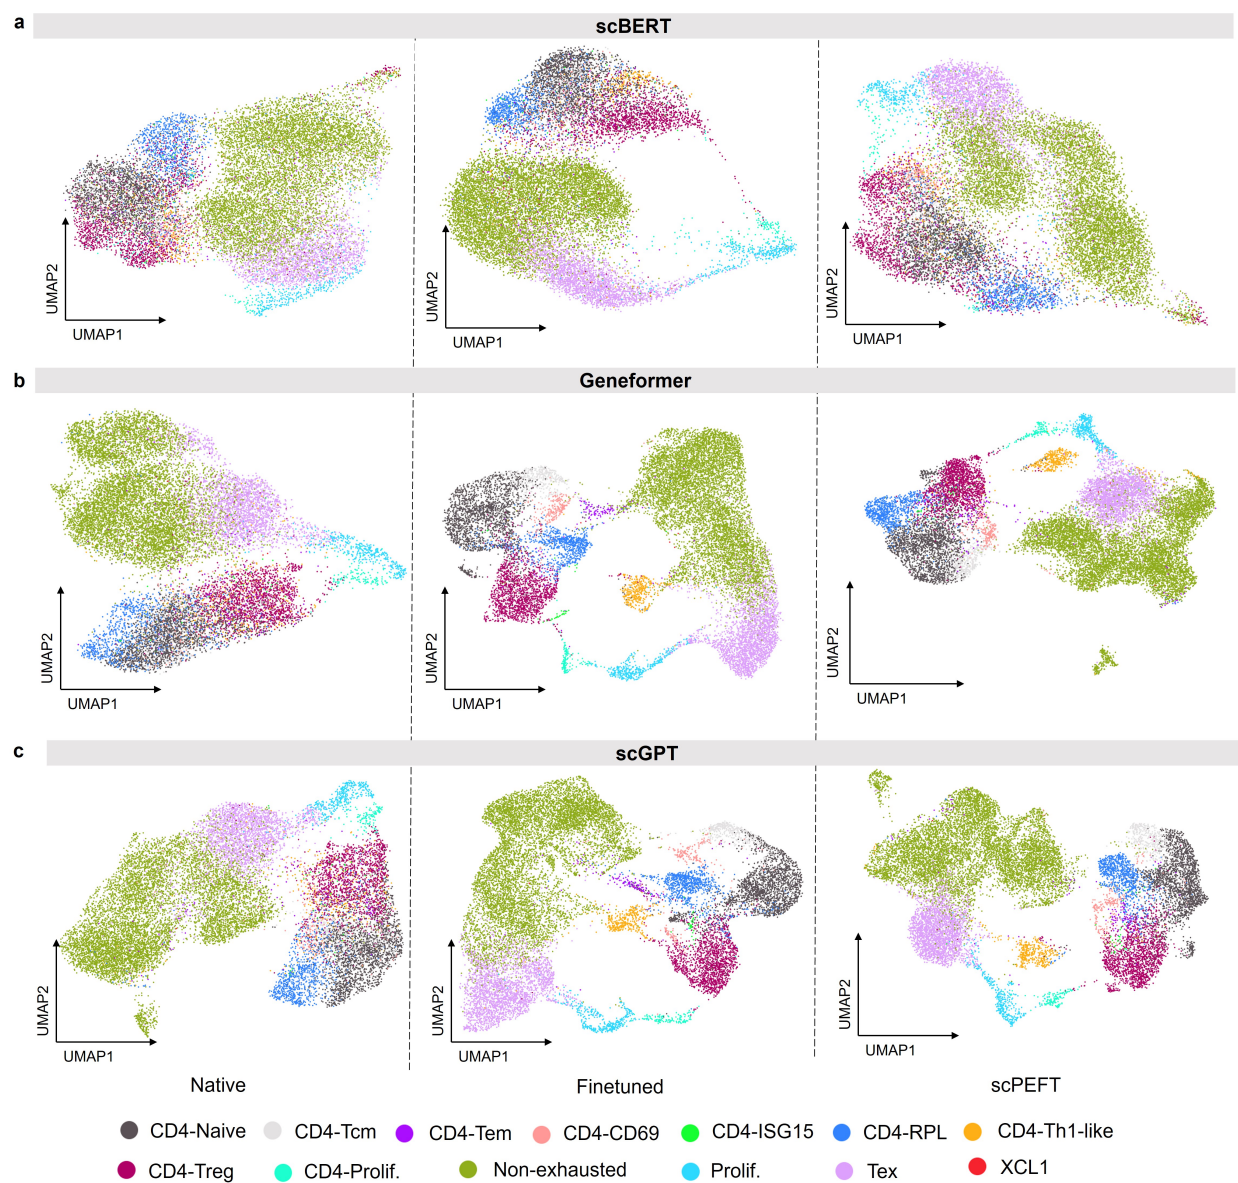

**Supplementary Figure 2. UMAP visualizations of cell type identification on the NSCLC dataset.** The UMAP visualizations were generated from the native, finetuned scLLMs, and scPEFT models with different backbones (a) scBERT, (b) Geneformer, and (c) scGPT, respectively.
