# Supplementary material for: Harnessing the Power of Single Cell Large Language Models with Parameter Efficient Fine-Tuning using scPEFT
Source: Research Square preprint supplement (doi:10.21203/rs.3.rs-5926885/v1), 2025-04-25
Supplement: Supplementary file 4 [file e35651c82c9c3d42ff2d5db7.pdf]

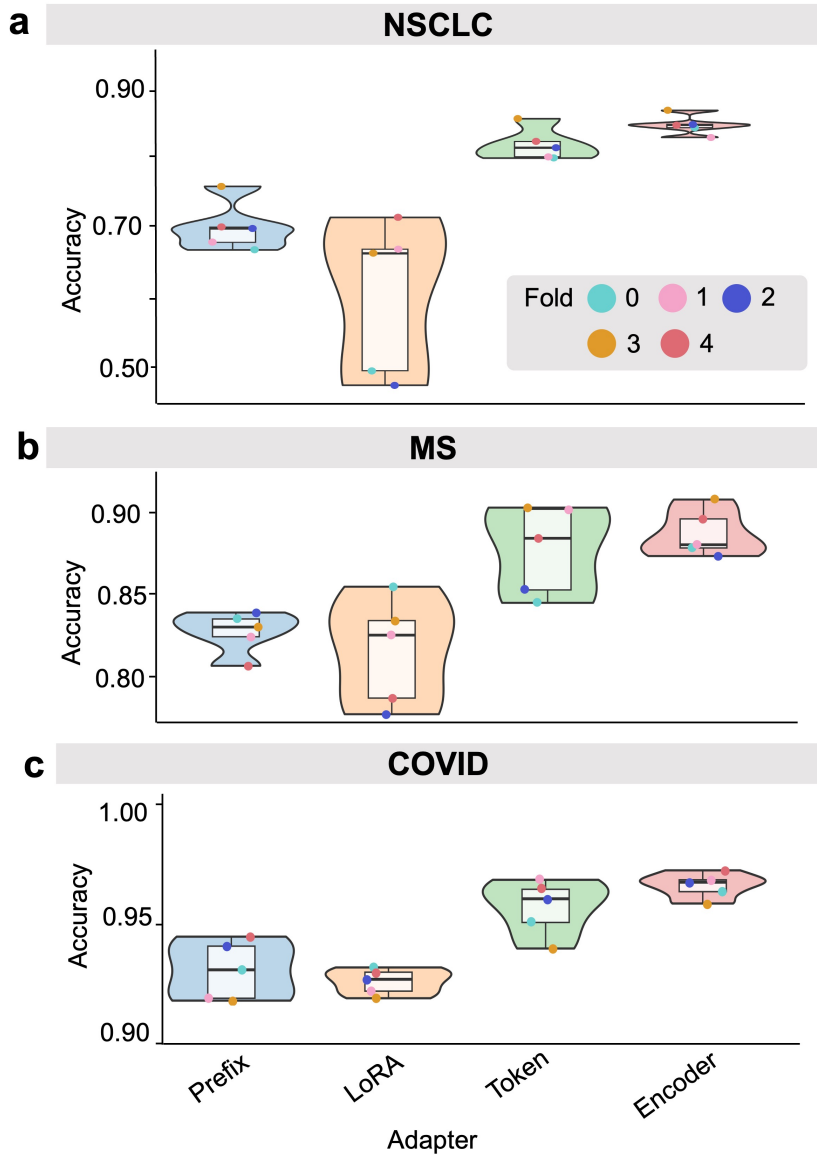

**Supplementary Figure 1. Violin plots of diverse adapters in scPEFT across multiple datasets.** These violin plots showcase the performance of diverse adapters in scPEFT with the scGPT backbone for cell type identification across (a) NSCLC, (b) MS, and (c) COVID datasets respectively.
